# Supplementary material
Source: PubMed Central journal article supplement (PMC4226651)
Supplement: NIHMS579582-supplement-2.pdf [file NIHMS579582-supplement-2.pdf]

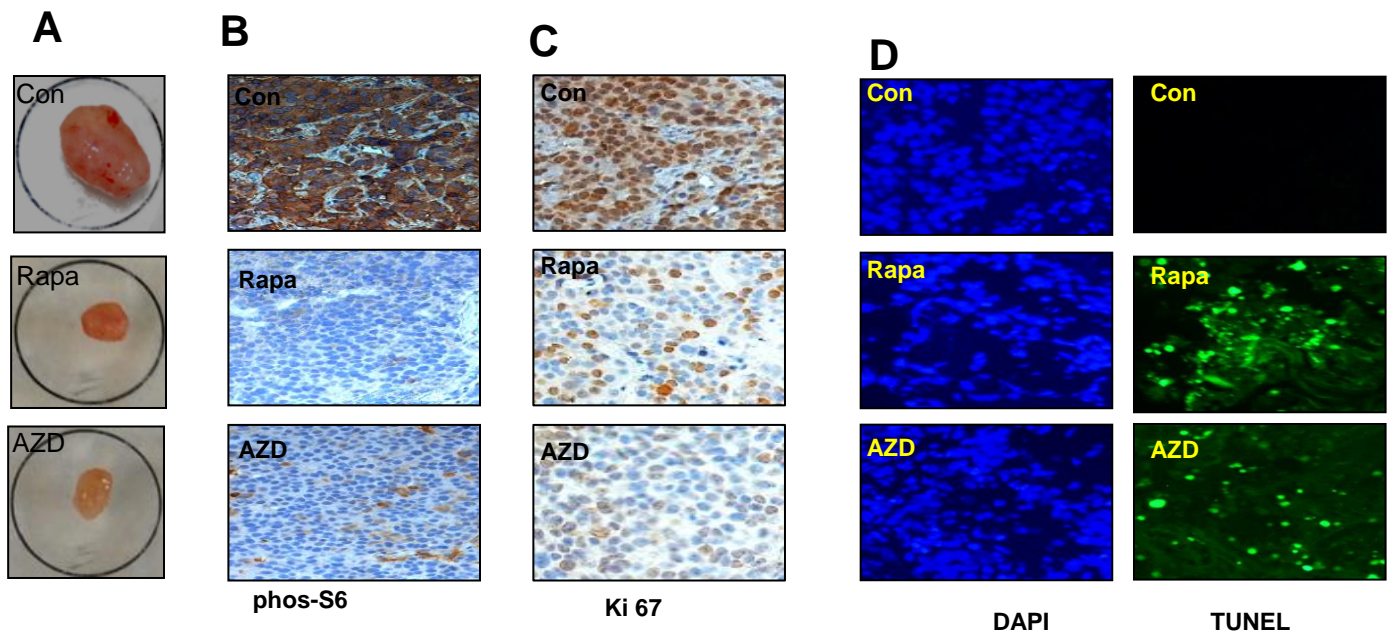

**Figure 2S. mTOR inhibitors reduce proliferation and promote apoptosis of PELP1-WT driven tumors.** (A) Representative picture of tumor is shown . (B) IHC analysis of S6 phosphorylation in xenograft tumors. (C) Ki-67 expression as a marker of proliferation was analyzed by using IHC . (D) TUNEL staining was performed as a marker of apoptosis on tumors that were treated with Rapamycin or AZD8055
